# Supplementary material for: pH-Responsive PEGylated Niosomal Nanoparticles as an Active-Targeting Cyclophosphamide Delivery System for Gastric Cancer Therapy
Source: MDPI journal article supplement (doi:10.3390/molecules27175418), 2022-08-24
Supplement: s1 [file s1]

## Supporting Information

### **pH-Responsive PEGylated Niosomal Nanoparticles as an Active-Targeting Cyclophosphamide Delivery System for Gastric Cancer Therapy**

Farnaz Khodabakhsh<sup>1,†,\*</sup>, Mahsa Bourbour<sup>2,†</sup>, Mohammad Tavakkoli Yarak<sup>3</sup>, Saina

Bazzazan<sup>4</sup>, Haleh Bakhshandeh<sup>5</sup>, Reza Ahangari Cohan<sup>5,\*</sup>, Yen Nee Tan<sup>6,7,\*</sup>

- 1 Department of Genetics and Advanced Medical Technology, Medical Biotechnology Research Center, Faculty of Medicine, AJA University of Medical Sciences, Tehran 1411718541, Iran
  - 2 Department of Biotechnology, Alzahra University, Tehran 1993893973, Iran
  - 3 School of Natural Sciences, Macquarie University, Sydney, NSW 2109, Australia
  - 4 Department of Community Medicine, Mashhad Branch, Islamic Azad University, Mashhad 9187147578, Iran
  - 5 Department of Nanobiotechnology, New Technologies Research Group, Pasteur Institute of Iran, Tehran 1316943551, Iran
  - 6 Faculty of Science, Agriculture and Engineering, Newcastle University, Newcastle Upon Tyne NE1 7RU, UK
  - 7 Newcastle Research and Innovation Institute, Newcastle University in Singapore, Singapore 609607, Singapore
- \* Correspondence: farnaz.khodabakhsh@ajaums.ac.ir (F.K.); cohan\_r@yahoo.com (R.A.C.); Yennee.tan@newcastle.ac.uk (Y.N.T.)
- † These authors contributed equally to this work.

**Table S1.** Different levels of independent variables used by Central Composite design.

| Level                                    | -1  | 0  | +1 |
|------------------------------------------|-----|----|----|
| A (Lipid: Drug, molar ratio)             | 10  | 20 | 30 |
| B (Surfactant: Cholesterol, molar ratio) | 0.5 | 1  | 2  |

**Table S2.** Two types of categorical variables used by Central Composite design.

| Factor | Name            | Type      | Level 1 | Level 2 |
|--------|-----------------|-----------|---------|---------|
| C      | Surfactant type | Categoric | Span20  | Span60  |

**Table S3.** The primers used in PCR

| Gene             | Primer Sequence                                                                             |
|------------------|---------------------------------------------------------------------------------------------|
| <i>Cyclin D</i>  | Forward: 5'- CAGATCATCCGCAAACACGC-3'<br>Reverse: 5'- AAGTTGTTGGGGCTCCTCAG-3'                |
| <i>β-actin</i>   | Forward: 5'- TCCTCCTGAGCGCAAGTAC-3'<br>Reverse: 5'- CCTGCTTGCTGATCCACATCT-3'                |
| <i>Caspase 3</i> | Forward: 5'- CATACTCCACAGCACCTGGTTA-3'<br>Reverse: 5'- ACTCAAATTCTGTTGCCACCTT-3'            |
| <i>Caspase 9</i> | Forward: 5'-CATATGATCGAGGACATCCAG-3<br>Reverse: 5'-TTAGTTTCGCAGAAACGAAGC-3'                 |
| <i>Cyclin E</i>  | Forward: 5'- CTCCAGGAAGAGGAAGGCAA-3'<br>Reverse: 5'- TTGGGTAAACCCGGTCATCA-3'                |
| <i>MMP-2</i>     | Forward: 5'- TTG ACG GTA AGG ACGGAC TC -3'<br>Reverse: 5'- CAT ACT TCA CAC GGA CCA CTTG -3' |
| <i>MMP-9</i>     | Forward: 5'- GCACGACGTCTTCCAGTACC -3'<br>Reverse: 5'- CAGGATGTCATAGGTCACGTAGC -3'           |

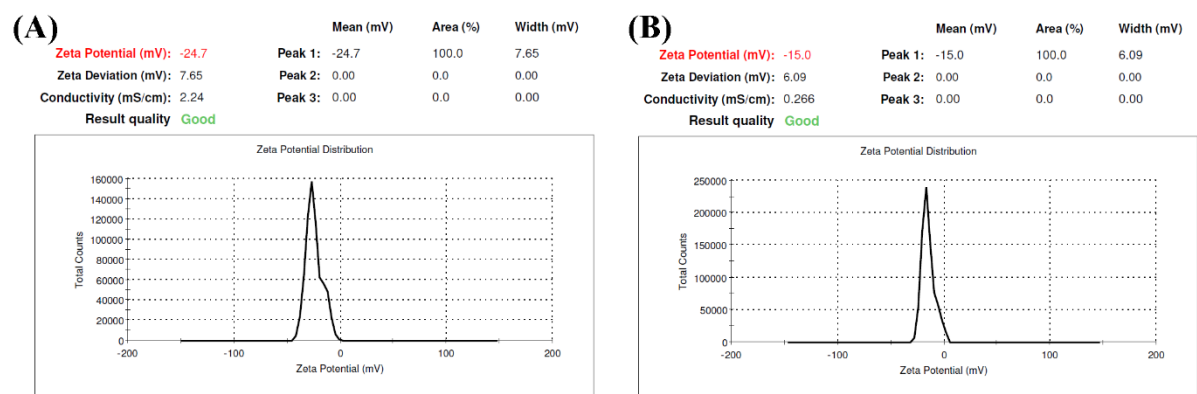

**Figure S1.** Zeta potential measurement of Nio-Cyclo (A), and Nio-Cyclo-PEG (B).

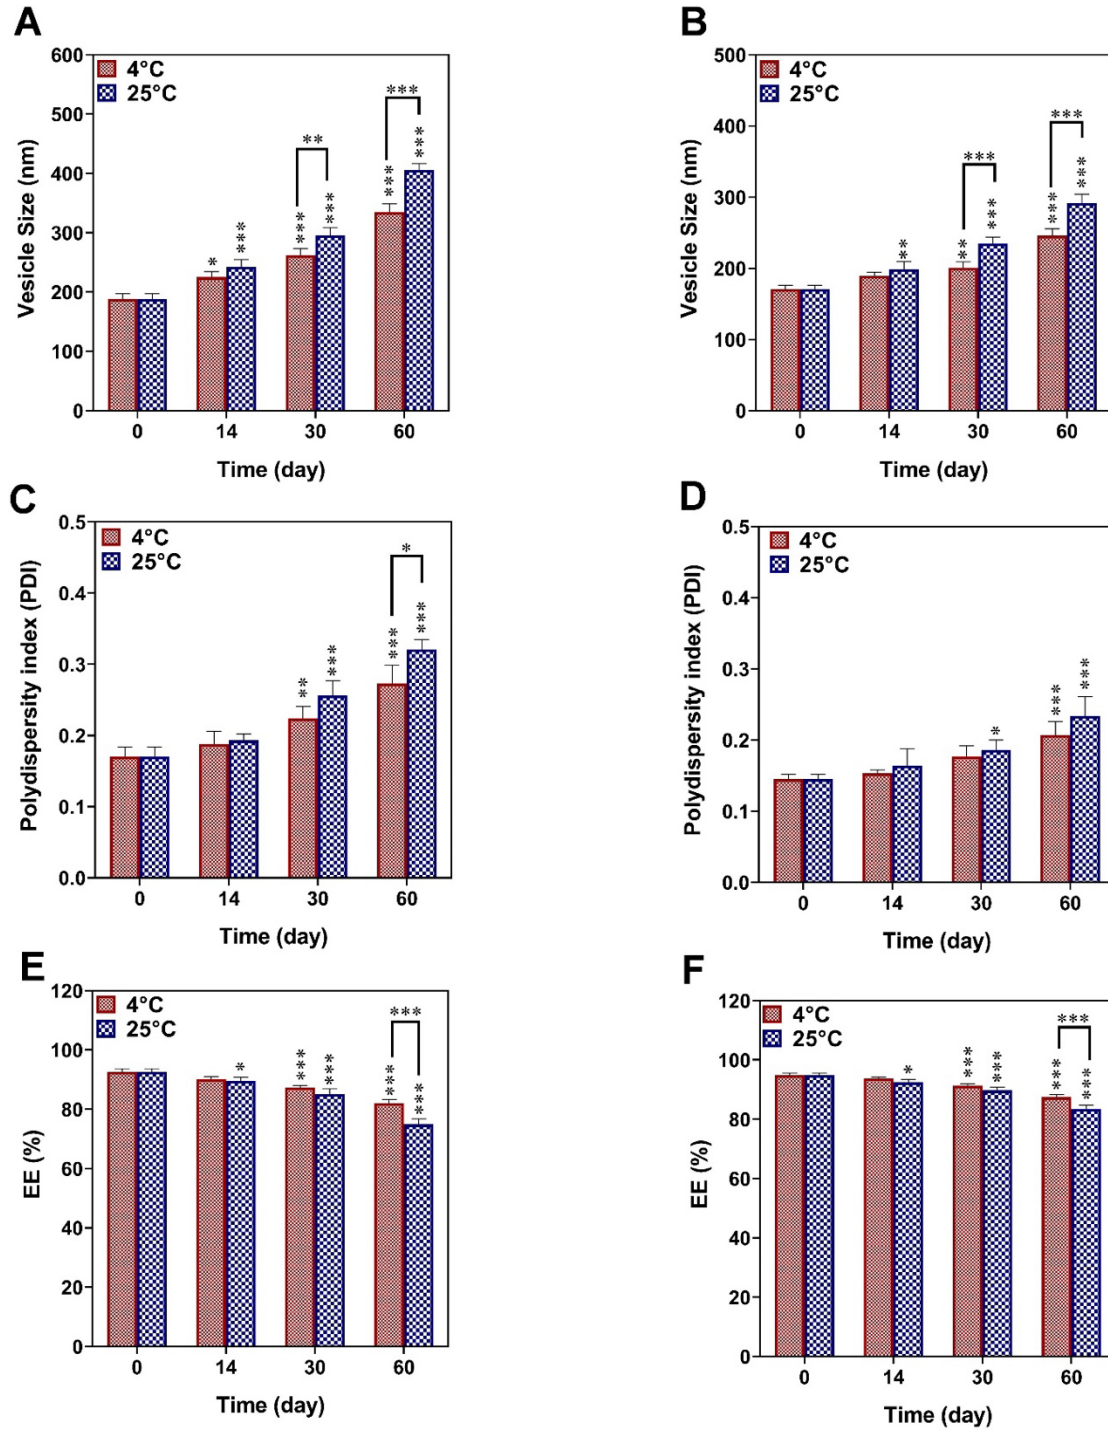

**Figure S2.** The impact of storage time (14, 30 and 60 days) and storage temperature (4 °C and 25 °C) on a, b) The average size, c, d) the polydispersity index (PDI), and e, f) The entrapment efficiency of cyclophosphamide in Nio-Cyclo and Nio-Cyclo-PEG formulations (Data presented as average  $\pm$  SD); The P-values are \*: P<0.05, \*\*: P<0.01 and \*\*\*: P<0.001.
